# Supplementary material for: Folate-Targeted Curcumin-Loaded Niosomes for Site-Specific Delivery in Breast Cancer Treatment: In Silico and In Vitro Study
Source: MDPI journal article supplement (doi:10.3390/molecules27144634), 2022-07-20
Supplement: s1 [file s1]

# Folate-Targeted Curcumin-Loaded Niosomes for Site-Specific Delivery in Breast Cancer Treatment: In Silico and In Vitro Study

Banafsheh Honarvari <sup>1,†</sup>, Sara Karimifard <sup>2,†</sup>, Niyayesh Akhtari <sup>3,†</sup>, Mehrnoush Mehrarya <sup>4</sup>, Zahra Salehi Moghaddam <sup>5</sup>, Mohammad Javed Ansari <sup>6</sup>, Abduladheem Turki Jalil <sup>7</sup>, Adrián Matencio <sup>8</sup>, Francesco Trotta <sup>8</sup>, Faten Eshрати Yeganeh <sup>9</sup>, Bahareh Farasati Far <sup>10</sup>, Mandana Kazem Arki <sup>11</sup>, Mohammad Reza Naimi-Jamal <sup>10</sup>, Hassan Noorbazargan <sup>12</sup>, Zahra Asghari Lalami <sup>3,\*</sup> and Mohsen Chiani <sup>13,\*</sup>

<sup>1</sup> Department of Physics, Faculty of Physics and Chemistry, Alzahra University, Tehran 1993893973, Iran; banafshehhonarvari@gmail.com

<sup>2</sup> Central Tehran Branch, Stem Cells Research Center, Tissue Engineering and Regenerative Medicine Institute, Islamic Azad University, Tehran 15689-37813, Iran; karimifard.sara@gmail.com

<sup>3</sup> Department of Biology, Parand Branch, Islamic Azad University, Parand 3761396361, Iran; niyayeshakhtari@gmail.com

<sup>4</sup> Protein Research Center, Shahid Beheshti University, Tehran 1983969411, Iran; mehrnoush1995@yahoo.com

<sup>5</sup> Department of Microbial Biotechnology, School of Biology, College of Science, University of Tehran, Tehran 14155-6455, Iran; salehi.moghaddam@ut.ac.ir

<sup>6</sup> Department of Pharmaceutics, College of Pharmacy, Prince Sattam Bin Abdulaziz University, Al-kharj 16278, Saudi Arabia; javedpharma@yahoo.com

<sup>7</sup> Medical Laboratories Techniques Department, Al-Mustaqbal University College, Babylon, Hilla 51001, Iraq; abedalazeem799@gmail.com

<sup>8</sup> Department of Chemistry, University of Turin, Via Pietro Giuria 7, 10125 Torino, Italy; adrian.matencioduran@unito.it (A.M.); francesco.trotta@unito.it (F.T.)

<sup>9</sup> Science and Research Branch, Department of Chemistry, Islamic Azad University, Tehran 14515-775, Iran; ffyeganeh@gmail.com

<sup>10</sup> Research Laboratory of Green Organic Synthesis and Polymers, Department of Chemistry, Iran University of Science and Technology, Tehran 16846-11367, Iran; bahar.farasati@gmail.com (B.F.F.); naimi@iust.ac.ir (M.R.N.-J.)

<sup>11</sup> Gastroenterology and Liver Diseases Research Center, Research Institute for Gastroenterology and Liver Diseases, Shahid Beheshti University of Medical Sciences, Tehran 19835-178, Iran; mandana.arki@gmail.com

<sup>12</sup> Department of Biotechnology, School of Advanced Technologies in Medicine, Shahid Beheshti University of Medical Sciences, Tehran 19857-17443, Iran; h.noorbazargan@sbm.ac.ir

<sup>13</sup> New Technology Research Group, Department of Nano Biotechnology, Pasteur Institute of Iran, Tehran 1316943551, Iran

\* Correspondence: zahraasghari68@yahoo.com (Z.A.L.); chiani@pasteur.ac.ir (M.C.)

† These authors contributed equally to this work.

**Table S1.** Different niosomal formulations for encapsulation of curcumin.

| <b>Formulation</b> | <b>Type of Surfactant</b> | <b>Lipid/Drug (mol ratio)</b> | <b>HLB</b> | <b>Transition temperature , Tc (°C)</b> | <b>Drug concentration(mg/ml)</b> | <b>Sonication time (min)</b> | <b>Surfactant: Cholesterol: DCP (molar ratio)</b> |
|--------------------|---------------------------|-------------------------------|------------|-----------------------------------------|----------------------------------|------------------------------|---------------------------------------------------|
| Nio-Cur1           | Span20                    | 10                            | 8.60       | 16                                      | 1                                | 5                            | 2:1:0.05                                          |
| Nio-Cur 2          | Span60                    | 10                            | 4.70       | 53                                      | 1                                | 5                            | 2:1:0.05                                          |
| Nio-Cur 3          | Span80                    | 10                            | 4.30       | -12                                     | 1                                | 5                            | 2:1:0.05                                          |
| Nio-Cur 4          | Span20                    | 20                            | 8.60       | 16                                      | 1                                | 5                            | 2:1:0.05                                          |
| Nio-Cur 5          | Span60                    | 20                            | 4.70       | 53                                      | 1                                | 5                            | 2:1:0.05                                          |
| Nio-Cur 6          | Span80                    | 20                            | 4.30       | -12                                     | 1                                | 5                            | 2:1:0.05                                          |
| Vehicle (Nio)      | Span80                    | 10                            | 4.30       | -12                                     | -                                | 5                            | 2:1:0.05                                          |
| PEG-FA@Nio-Cur 3   | Span80                    | 20                            | 4.30       | -12                                     | 1                                | 5                            | 2:1:0.05                                          |

**Table S2.** Primers and their sequences are used in real-time PCR.

| Gene                   | Forward Primer                 | Reverse Primer              |
|------------------------|--------------------------------|-----------------------------|
| <i>Bax</i>             | 5'-CGGCAACTTCAACTGGGG-3'       | 5'-TCCAGCCCAACAGCCG-3'      |
| <i>BCL<sub>2</sub></i> | 5'-GGTGCCGGTTCAGGTACTCA-3'     | 5'-TTGTGGCCTTCTTTGAGTTCG-3' |
| <i>p53</i>             | 5'-CATCTACAAGCAGTCACAGCACAT-3' | 5'-CAACCTCAGGCGGCTCATAG-3'  |
| <i>β-actin</i>         | 5'-TCCTCCTGAGCGCAAGTAC -3'     | 5'-CCTGCTTGCTGATCCACATCT-3' |
| <i>PBGD</i>            | 5'-ATGTCCGGTAACGGCGGC-3'       | 5'-CAGCATCGCTACCACAGTGTC-3' |

**Table S3.** Bax, Bcl2, and p53 PDB features

| Target         | Resolution | R-Value<br>Free | R-Value<br>Work | R-Value<br>Observed | Total<br>Structure<br>Weight<br>(kDa) | Atom<br>Count | Mutation(s) | Unique<br>protein<br>chains | position | Gene<br>length |
|----------------|------------|-----------------|-----------------|---------------------|---------------------------------------|---------------|-------------|-----------------------------|----------|----------------|
| 6GL8<br>(Bcl2) | 1.40 Å     | 0.194           | 0.178           | 0.179               | 20.95 kDa                             | 1414          | yes         | 1                           | 9-206    | 239            |
| 6EB6<br>(Bax)  | 2.02 Å     | 0.201           | 0.171           | 0.173               | 21.27 kDa                             | 1492          | yes         | 1                           | 1-192    | 192            |
| 6SL6<br>(p53)  | 1.67 Å     | 0.180           | 0.163           | 0.164               | 28.18 kDa                             | 1902          | yes         | 1                           | 89-311   | 393            |

**Table S4.** Significant Bax, Bcl2, and p53 features in Uniport server.

| Ligand      | Subcellular location              |                       | Position of mutagenesis |                   |                                                                                             |
|-------------|-----------------------------------|-----------------------|-------------------------|-------------------|---------------------------------------------------------------------------------------------|
| <i>Bax</i>  | Isoform Alpha                     | Mitochondrion         | 21                      | K → E             | Reduces interaction with <i>Bcl2L11</i> , homo-oligomerization, and triggering of apoptosis |
|             |                                   | Cytoplasm and Cytosol |                         |                   |                                                                                             |
|             | Isoform Beta                      | Cytoplasm and Cytosol | 74                      | M → D or E        | Strongly reduced interaction with MCL1, <i>Bcl2</i> , <i>Bcl2L1</i> , and <i>Bcl2L2</i> .   |
|             | Isoform Gamma                     | Cytoplasm and Cytosol | 184                     | S → D, E, H, or K | S → D, E, H or K: Constitutive cytoplasmic location.                                        |
| <i>Bcl2</i> | Isoform Delta                     | Cytoplasm and Cytosol | 184                     | S → V             | S → V: Constitutive mitochondrial location.                                                 |
|             | 1: Nucleus membrane               |                       | 34                      | D → A             | Abolishes cleavage by caspase-3                                                             |
|             |                                   |                       | 64                      | D → A             | No effect on cleavage by caspase-3.                                                         |
|             |                                   |                       | 138-141                 |                   | Loss of <i>Bax</i> -binding and anti-apoptotic activity                                     |
|             | 2: Endoplasmic reticulum membrane |                       | 144                     | W → A             | Loss of <i>Bax</i> -binding and anti-apoptotic activity                                     |
|             |                                   |                       | 145                     | G → A             | Loss of <i>Bax</i> -binding and anti-apoptotic activity                                     |
|             |                                   |                       | 145                     | G → E             | Loss of <i>Bax</i> -binding and anti-apoptotic activity                                     |
|             | 3: Mitochondrion Outer membrane   |                       | 146                     | R → A             | Loss of <i>Bax</i> -binding and anti-apoptotic activity                                     |
|             |                                   |                       | 188                     | W → A             | Loss of <i>Bax</i> -binding and anti-apoptotic activity                                     |
|             |                                   |                       | 190                     | Q → L             | Partial loss of <i>Bax</i> -binding and 50% decrease in anti-apoptotic activity             |

|            |                          |         |         |                                                                                               |
|------------|--------------------------|---------|---------|-----------------------------------------------------------------------------------------------|
| <i>p53</i> |                          | 191     | D → A   | Partial loss of <i>Bax</i> -binding and 50% decrease in anti-apoptotic activity               |
|            |                          | 192     | N → A   | Partial loss of <i>Bax</i> -binding and 50% decrease in anti-apoptotic activity               |
|            |                          | 194-197 | Missing | Loss of <i>Bax</i> -binding and anti-apoptotic activity                                       |
|            |                          | 200     | E → A   | Partial loss of <i>Bax</i> -binding and 50% decrease in anti-apoptotic activity               |
|            | 1: Cytoskeleton          | 15      | S → A   | Loss of interaction with PPP2R5C, PPP2CA, and PPP2R1A                                         |
|            |                          | 18      | T → A   | No effect on interaction with MDM2 and increase in protein levels after DNA damage            |
|            |                          | 20      | S → A   | Abolishes phosphorylation site. Abolishes increase in protein levels after DNA damage         |
|            |                          | 20      | S → D   | Constitutively increased <i>TP53</i> protein levels                                           |
|            |                          | 22-23   | LW → QS | Loss of interaction with MDM2, leading to constitutively increased <i>TP53</i> protein levels |
|            |                          | 24      | K → R   | Abolishes ubiquitination by MUL1                                                              |
|            |                          | 37      | S → D   | Abolishes phosphorylation by MAPKAPK5                                                         |
|            |                          | 46      | S → A   | Abolishes phosphorylation by DYRK2 and HIPK2 and acetylation of K-382 by CREBBP               |
|            |                          | 46      | Missing | Alters interaction with WWOX                                                                  |
|            |                          | 55      | T → A   | Blocks phosphorylation by TAF1                                                                |
|            |                          | 183     | S → A   | Strongly abolishes phosphorylation                                                            |
|            |                          | 183     | S → E   | Inhibits slightly its transcriptional activity                                                |
|            |                          | 248     | R → A   | Does not induce SNAIL1 degradation                                                            |
|            | 4: Endoplasmic reticulum | 269     | S → A   | Abolishes phosphorylation                                                                     |
|            |                          | 269     | S → E   | Strongly inhibits its transcriptional activity                                                |
|            | 5: Nucleus               | 284     | T → E   | Strongly inhibits its transcriptional activity                                                |
|            |                          | 291-292 | KK → RR | Abolishes polyubiquitination by MKRN1                                                         |
|            |                          | 319     | K → A   | Loss of nuclear localization, when associated with A-320 and A-321                            |
|            |                          | 320     | K → A   | Loss of nuclear localization, when associated with A-319 and A-321                            |
|            |                          | 321     | K → A   | Loss of nuclear localization, when associated with A-319 and A-320                            |

|             |             |                                                                                  |
|-------------|-------------|----------------------------------------------------------------------------------|
| 333-<br>337 | RGRER→KGKEK | Reduced methylation by PRMT5. Reduced nuclear localization.                      |
|             |             | Decreased binding to promoters of target genes. Reduced transcriptional activity |
| 359         | P → D       | Abolishes binding to USP7                                                        |
| 361         | G → E       | Abolishes binding to USP7                                                        |
| 362         | S → A       | Abolishes binding to USP7                                                        |
| 370         | K → R       | Induces a decrease in methylation by SMYD2                                       |
| 372         | K → R       | Induces a decrease in protein stabilization                                      |
| 373         | K → R       | Abolishes dimethylation by EHMT1 and EHMT2                                       |
| 382         | K → A       | Abolishes acetylation by CREBBP                                                  |
| 382         | K → R       | Abolishes monomethylation by KMT5A                                               |
| 383         | L → A       | Abolishes S-315 phosphorylation by CDK2/cyclin A                                 |
| 385         | F → A       | Reduced SUMO1 conjugation                                                        |
| 386         | K → A       | Abolishes SUMO1 conjugation, in vitro and in vivo                                |
| 387         | T → A       | No effect SUMO1 conjugation                                                      |
| 388         | E → A       | Abolishes SUMO1 conjugation                                                      |

**Table S5.** Imperative features of all three genes (Bax, Bcl2 and p53 in *Homo sapiens*) from the protparam server.

| gene        | Theoretical pI | The estimated half-life                                                                                                   | Instability index   | Total number of negatively charged residues (Asp + Glu) | Total number of positively charged residues (Arg + Lys) |
|-------------|----------------|---------------------------------------------------------------------------------------------------------------------------|---------------------|---------------------------------------------------------|---------------------------------------------------------|
| <i>Bax</i>  | 5.08           | 30 hours<br>(mammalian reticulocytes, in vitro).<br>>20 hours (yeast, in vivo).<br>>10 hours (Escherichia coli, in vivo). | 36.42<br>(stable)   | 23                                                      | 20                                                      |
| <i>Bcl2</i> | 6.75           | 30 hours<br>(mammalian reticulocytes, in vitro).<br>>20 hours (yeast, in vivo).<br>>10 hours (Escherichia coli, in vivo). | 51.63<br>(unstable) | 22                                                      | 21                                                      |
| <i>p53</i>  | 8.17           | >20 hours<br>(mammalian reticulocytes, in vitro).<br>>20 hours (yeast, in vivo).                                          | 70.55<br>(unstable) | 43                                                      | 45                                                      |

**Table S6.** Validation of three proteins (6GL8(Bcl2), 6EB6(Bax), 6SL6(p53)) by using the SAVES program.

|          | Target     | ERRAT<br>score | Verify<br>3D score | z-<br>score | Ramachandran plot |                       |                       |            |
|----------|------------|----------------|--------------------|-------------|-------------------|-----------------------|-----------------------|------------|
|          |            |                |                    |             | Favored<br>region | Additional<br>allowed | Generosity<br>allowed | Disallowed |
| procheck | 6GL8(Bcl2) | 100%           | 100%               | -6.76       | 96.1%             | 3.9%                  | 0.0%                  | 0.0%       |
|          | 6EB6(Bax)  | 99.4152%       | 98.32%             | -7.99       | 94.9%             | 5.1%                  | 0.0%                  | 0.0%       |
|          | 6SL6(p53)  | 88.1443%       | 94.12%             | -6.18       | 93.1%             | 6.9%                  | 0.0%                  | 0.0%       |



**Table S7.** Predicted Drug likeness of curcumin according to Lipinski's rule.

| Drug likeness rule | Property (unit)        | Rule       | Predicted Result<br>curcumin | Predicted Result<br>Ascorbic acid |
|--------------------|------------------------|------------|------------------------------|-----------------------------------|
| Lipinski's rule    | Molecular weight       | $\leq 500$ | 368.38gr/mol                 | 176.12 gr/mol                     |
|                    | Lipophilicity (LogP)   | $\leq 5$   | 3.03                         | 0.39                              |
|                    | Hydrogen bond acceptor | $\leq 10$  | 6                            | 6                                 |
|                    | Hydrogen bond donors   | $\leq 5$   | 2                            | 4                                 |

**Table S8.** Predicted pharmacokinetic profile of curcumin.

| Category                       | Property (unit)                                  | Predicted curcumin Result | ADMETLAB standards                                                                                                                                                                                                                                                                                                              |
|--------------------------------|--------------------------------------------------|---------------------------|---------------------------------------------------------------------------------------------------------------------------------------------------------------------------------------------------------------------------------------------------------------------------------------------------------------------------------|
| Basic physicochemical property | LogP (partition coefficient) (log mol/L)         | 3.37                      | Favorable: $0 < \text{LogP} < 3$<br>LogP $< 0$ : high aqueous solubility.<br>LogP $> 3$ : poor aqueous solubility.                                                                                                                                                                                                              |
|                                | LogD7.4 (Distribution coefficient D) (log mol/L) | 0.969                     | $< 1$ : high solubility, low Permeability, and Metabolism; Permeability possible via paracellular if MW $< 200$ .<br>1 to 3: moderate Solubility, Permeability; and low Metabolism.<br>3 to 5: low solubility; high Permeability; and moderate to high Metabolism.<br>$> 5$ : low Solubility; high Permeability and Metabolism. |
|                                | Log S(solubility) (Log mol/L)                    | -4.733                    | Favorable: higher than $-4 \log \text{mol/L}$<br>$< 10 \mu\text{g/mL}$ : Low solubility;<br>$10\text{--}60 \mu\text{g/mL}$ : Moderate solubility;<br>$> 60 \mu\text{g/mL}$ : High solubility                                                                                                                                    |
|                                | Papp (Caco-2 permeability) (cm/s)                | -5.052                    | Favorable: higher than $-5.15 \text{ Log unit}$ or $-4.70$ or $-4.80$                                                                                                                                                                                                                                                           |
| Absorption                     | HIA (Human Intestinal Absorption) (%)            | 0.569                     | $> 0.5$ : HIA positive<br>$< 0.5$ : HIA negative                                                                                                                                                                                                                                                                                |
|                                | Pgp-inhibitor                                    | 0.217                     | $> 0.5$ : An inhibitor<br>$< 0.5$ : non-inhibitor                                                                                                                                                                                                                                                                               |
|                                | Pgp-substrate                                    | 0.061                     | $> 0.5$ : A substrate<br>$< 0.5$ : non-substrate                                                                                                                                                                                                                                                                                |
| Distribution                   | PPB (Plasma protein binding) (%)                 | 87.01                     | 90%:<br>highly protein-bound and low therapeutic index.                                                                                                                                                                                                                                                                         |
|                                | BBB (Blood brain barrier) (%)                    | 0.814                     | $\geq 0.1$ : BBB positive<br>$< 0.1$ : BBB negative                                                                                                                                                                                                                                                                             |
|                                | VD (Volume Distribution)                         | -0.574                    | Favorable: $0.04\text{--}20 \text{L/kg}$ ;<br>$< 0.07 \text{L/kg}$ : highly hydrophilic Confined to blood, plasma protein-bound<br>$0.07\text{--}0.7 \text{L/kg}$ : Regularly distributed;<br>$> 0.7 \text{L/kg}$ : highly lipophilic; Bound to tissue components.                                                              |

|            |                                |        |                                                                                         |
|------------|--------------------------------|--------|-----------------------------------------------------------------------------------------|
| Metabolism | CYP1A2-Inhibitor               | 0.833  | >0.5: An inhibitor<br><0.5: non-inhibitor                                               |
|            | CYP1A2-Substrate               | 0.504  | >0.5: Substrate<br><0.5: non-substrate                                                  |
|            | CYP3A4-Inhibitor               | 0.032  | >0.5: An inhibitor<br><0.5: non-inhibitor                                               |
|            | CYP3A4-Substrate               | 0.406  | >0.5: Substrate<br><0.5: non-substrate                                                  |
|            | CYP2C9-inhibitor               | 0.071  | >0.5: An inhibitor<br><0.5: non-inhibitor                                               |
|            | CYP2C9-substrate               | -4.733 | >0.5: Substrate<br><0.5: non-substrate                                                  |
|            | CYP2C19-inhibitor              | 0.437  | >0.5: An inhibitor<br><0.5: non-inhibitor                                               |
|            | CYP2C19-substrate              | 0.454  | >0.5: Substrate<br><0.5: non-substrate                                                  |
|            | CYP2D6-inhibitor               | 0.214  | >0.5: An inhibitor<br><0.5: non-inhibitor                                               |
|            | CYP2D6-substrate               | 0.858  | >0.5: Substrate<br><0.5: non-substrate                                                  |
| Excretion  | Clearance<br>(mL/min/kg)       | 1.541  | >15 mL/min/kg: high<br>; 5mL/min/kg < Cl < 15mL/min/kg: moderate<br>; <5 mL/min/kg: low |
|            | T1/2 (Half-life) (H)           | 1.687  | >8h: high;<br>3h < Cl < 8h: moderate;<br><3h: low                                       |
| Toxicity   | hERG (hERG<br>blockers)        | 0.537  | >0.5: A Blocker<br><0.5: non-blocker                                                    |
|            | H-HT (Human<br>Hepatotoxicity) | 0.796  | >0.5: HHT positive<br><0.5: HHT negative                                                |

**Table S9.** Molecular docking of Bax, Bcl2, and p53 genes with curcumin.

|               | <b>RMSD lower bond</b> | <b>RMSD upper bond</b> | <b>Binding affinity</b> |
|---------------|------------------------|------------------------|-------------------------|
| Curcumin-Bax  | 0                      | 0                      | -6.3                    |
| Curcumin-Bcl2 | 0                      | 0                      | -5.0                    |
| Curcumin-p53  | 0                      | 0                      | -6.5                    |

**Table S10.** The residues in the hydrogen bond between Bax, Bcl2, p53 and curcumin.

| Proteins | p53                | Bax                     | bcl2              |
|----------|--------------------|-------------------------|-------------------|
| Residues | ARG110 – PHE 113 – |                         | TYR108 – SER205 – |
|          | LEU111 – ASN268 –  | LYS119 – LYS123 –       | LEU201 – ARG107 – |
|          | GLN144 – GLN104 –  | LEU122 – LYS128 –       | TYR202 – ARG129 – |
|          | HIS115 – TYR126 –  | ALA35 – THR127 – ASP84  | ARG146 – ASP103 – |
|          | ASP228 – TRP146 –  | – ILE80 – ARG34 – MET38 | SER205 – ARG107   |
|          | PHE113 – SER90     |                         |                   |

**Table S11.** Vesicle size, PDI, and EE % of various Cur-Nio and PEG-FA@Nio-Cur. Data are represented as mean  $\pm$  SD, n = 3.

| Formulation      | Vesicle Size (nm)  | Polydispersity index (PDI) | EE (%)               |
|------------------|--------------------|----------------------------|----------------------|
| Nio-Cur1         | 333.20 $\pm$ 21.07 | 0.250 $\pm$ 0.021          | 97.8778 $\pm$ 0.2962 |
| Nio-Cur 2        | 237.97 $\pm$ 4.56  | 0.390 $\pm$ 0.005          | 96.7111 $\pm$ 0.3469 |
| Nio-Cur 3        | 218.30 $\pm$ 12.41 | 0.200 $\pm$ 0.010          | 92.7111 $\pm$ 0.4194 |
| Nio-Cur 4        | 357.03 $\pm$ 41.03 | 0.290 $\pm$ 0.013          | 95.7667 $\pm$ 1.3017 |
| Nio-Cur 5        | 272.40 $\pm$ 18.98 | 0.280 $\pm$ 0.025          | 94.8222 $\pm$ 0.0962 |
| Nio-Cur 6        | 221.50 $\pm$ 13.31 | 0.290 $\pm$ 0.022          | 91.9944 $\pm$ 0.0096 |
| Vehicle (Nio)    | 164.80 $\pm$ 5.42  | 0.180 $\pm$ 0.013          | -                    |
| PEG-FA@Nio-Cur 3 | 187.13 $\pm$ 7.55  | 0.160 $\pm$ 0.033          | 98.2517 $\pm$ 0.7851 |

**Table S12.** The release kinetic models and the parameters seen for niosomal formulations.

| Release Model                 | Zero-Order     | Korsmeyer-Peppas |        | First-Order    | Higuchi        |
|-------------------------------|----------------|------------------|--------|----------------|----------------|
|                               | R <sup>2</sup> | R <sup>2</sup>   | n      | R <sup>2</sup> | R <sup>2</sup> |
| Free Curcumin (pH 7.4-37 °C)  | 0.4048         | 0.7030           | 0.3084 | 0.8669         | 0.6418         |
| Cur-Nio (pH 7.4-37 °C)        | 0.8185         | 0.9089           | 0.5598 | 0.8771         | 0.9396         |
| Cur-Nio (pH 5.4-37 °C)        | 0.8134         | 0.9326           | 0.4446 | 0.9113         | 0.9343         |
| PEG-FA@Nio-Cur (pH 7.4-37 °C) | 0.7915         | 0.9103           | 0.5053 | 0.8715         | 0.9209         |
| PEG-FA@Nio-Cur (pH 5.4-37 °C) | 0.7346         | 0.9164           | 0.3620 | 0.8764         | 0.8820         |
| Free Curcumin (pH 7.4-25 °C)  | 0.5709         | 0.7732           | 0.5844 | 0.9303         | 0.7425         |
| Cur-Nio (pH 7.4-25 °C)        | 0.8304         | 0.9110           | 0.6245 | 0.8720         | 0.9473         |
| Cur-Nio (pH 5.4-25 °C)        | 0.7924         | 0.9128           | 0.4518 | 0.8632         | 0.9227         |
| PEG-FA@Nio-Cur (pH 7.4-25 °C) | 0.7689         | 0.9024           | 0.5207 | 0.8229         | 0.9059         |
| PEG-FA@Nio-Cur (pH 5.4-25 °C) | 0.7520         | 0.9035           | 0.3986 | 0.8590         | 0.8927         |

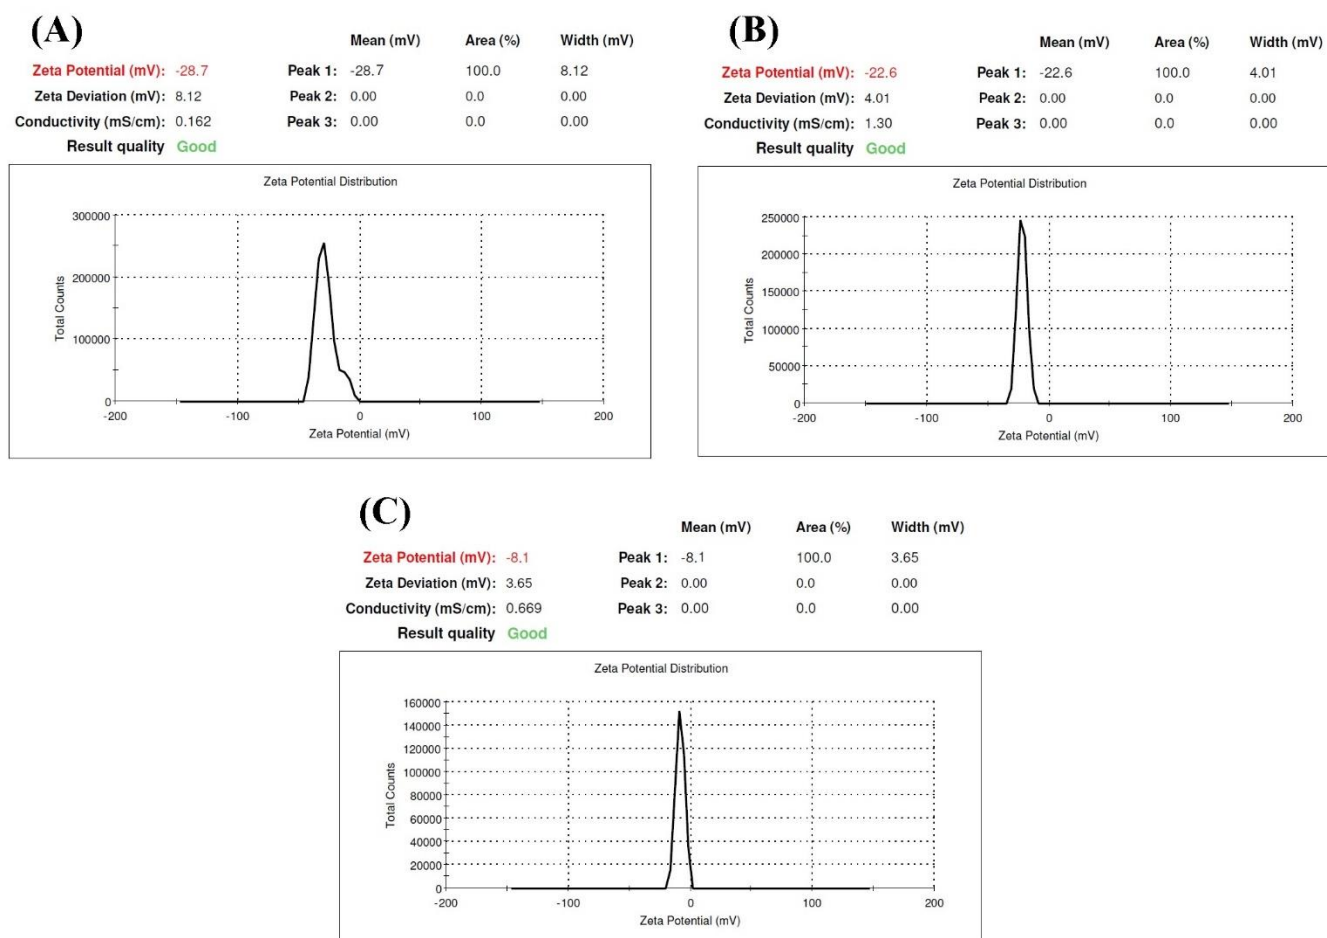

**Figure S1.** Zeta potential of Nio (A), Nio-Cur (B), and PEF-FA@Nio-Cur (C).



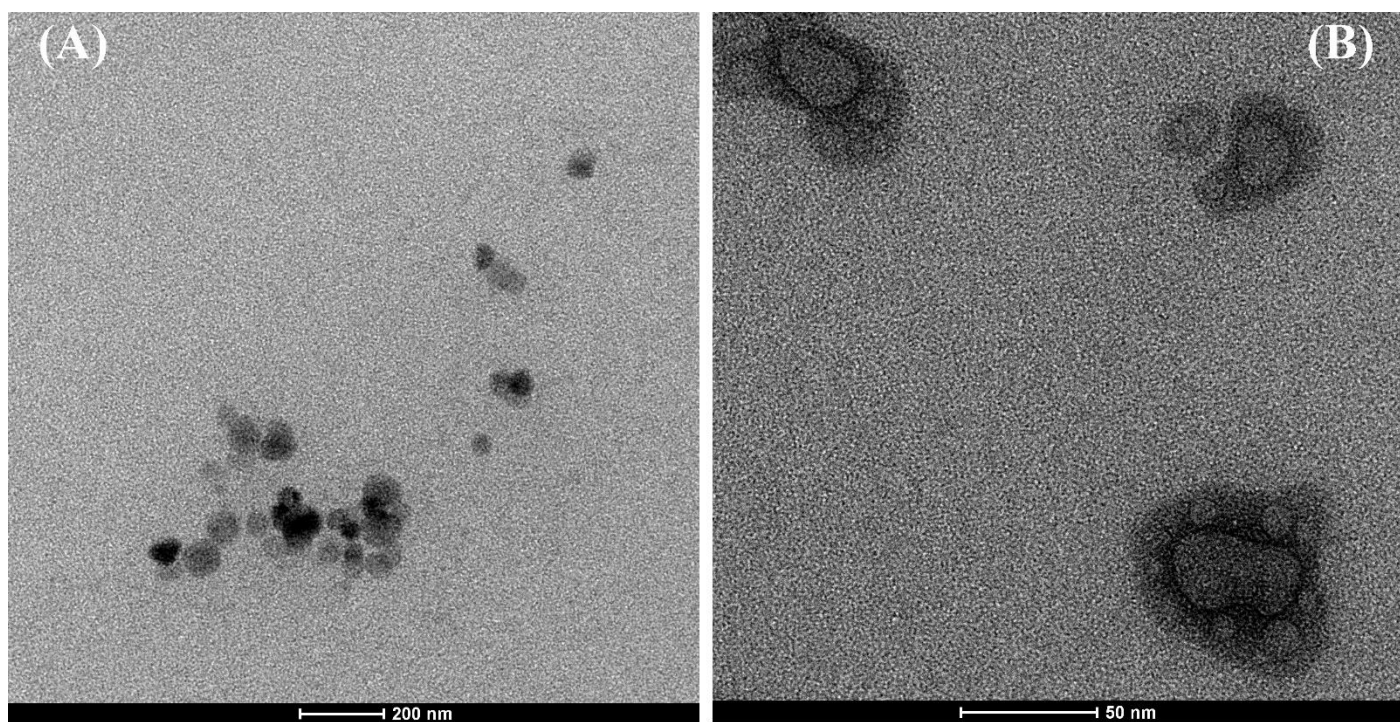

**Figure S2.** TEM image of the prepared optimized; Nio-Cur (A) and PEG-FA@Nio-Cur (B).

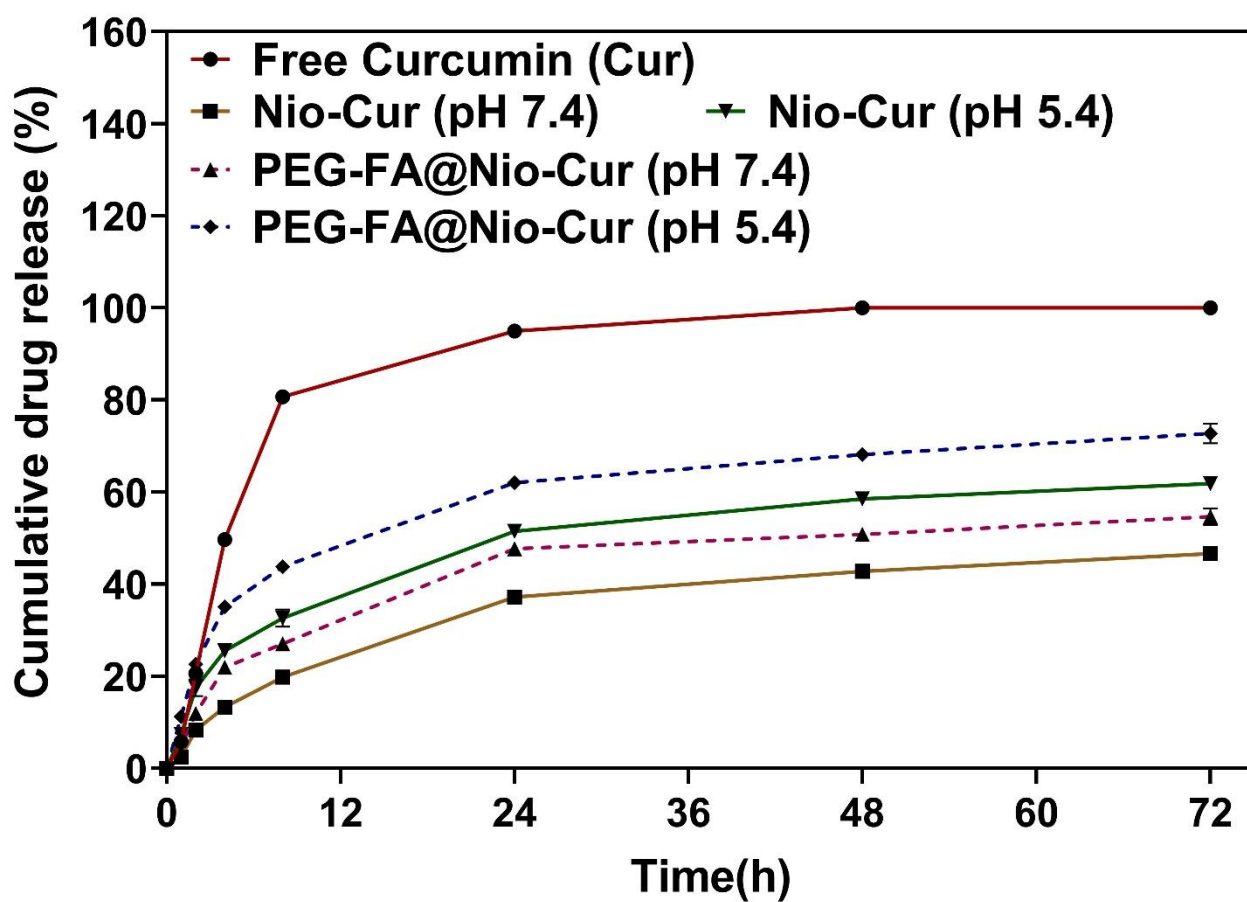

Figure S3. In vitro release of Cur from Nio-Cur3 and PEG-FA@Nio-Cur3 at pH 7.4 and pH 5.4 in 25 °C

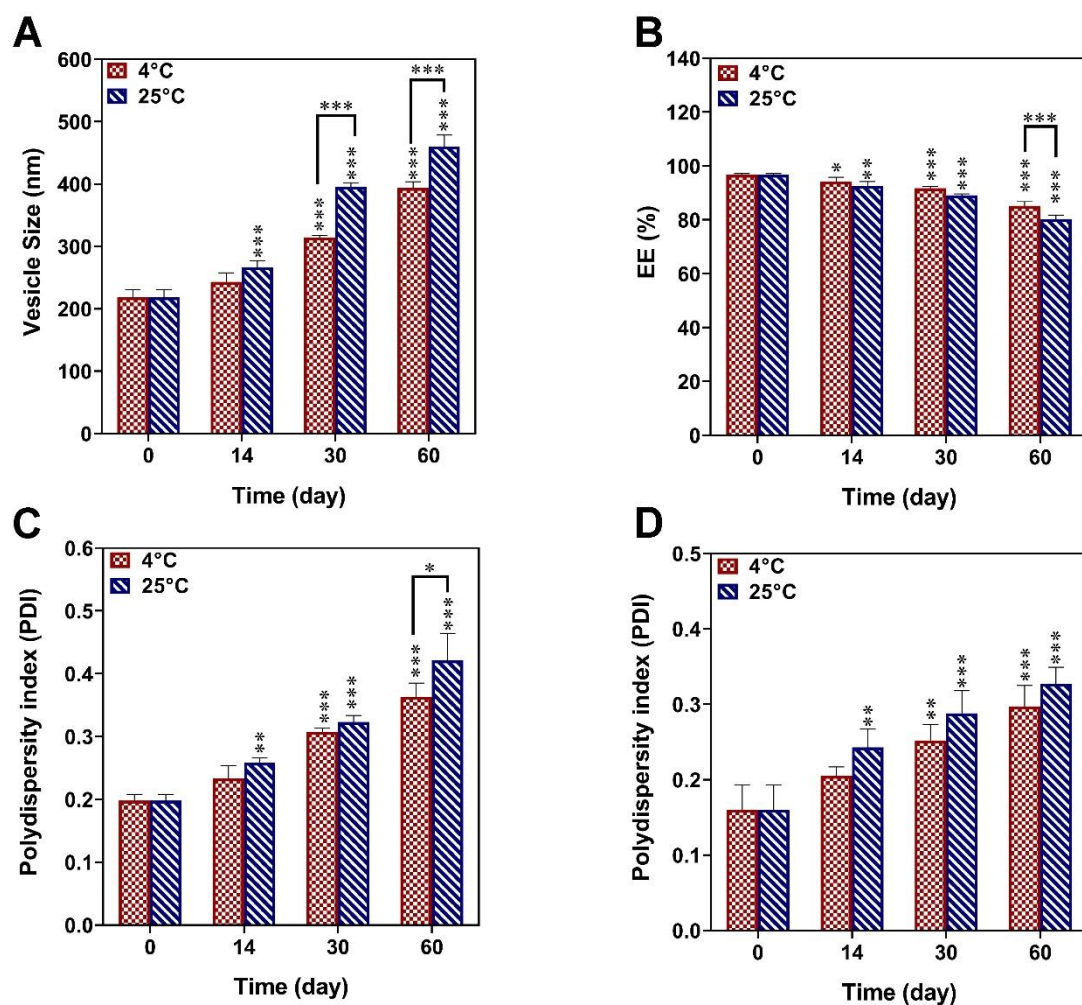

**Figure S4.** A) Size stability evaluation of Nio-Cur3, B) EE (%) stability evaluation of Nio-Cur3, C) PDI stability evaluation of Nio-Cur3, D) PDI stability evaluation of PEG-FA@Nio-Cur3, after two months of storage at  $4 \pm 2^\circ\text{C}$  and  $25 \pm 2^\circ\text{C}$ . Data are represented as mean  $\pm$  SD and  $n=3$ ;  $P<.001$ \*\*\*,  $P<.01$  \*\*,  $P<.05$  \*.

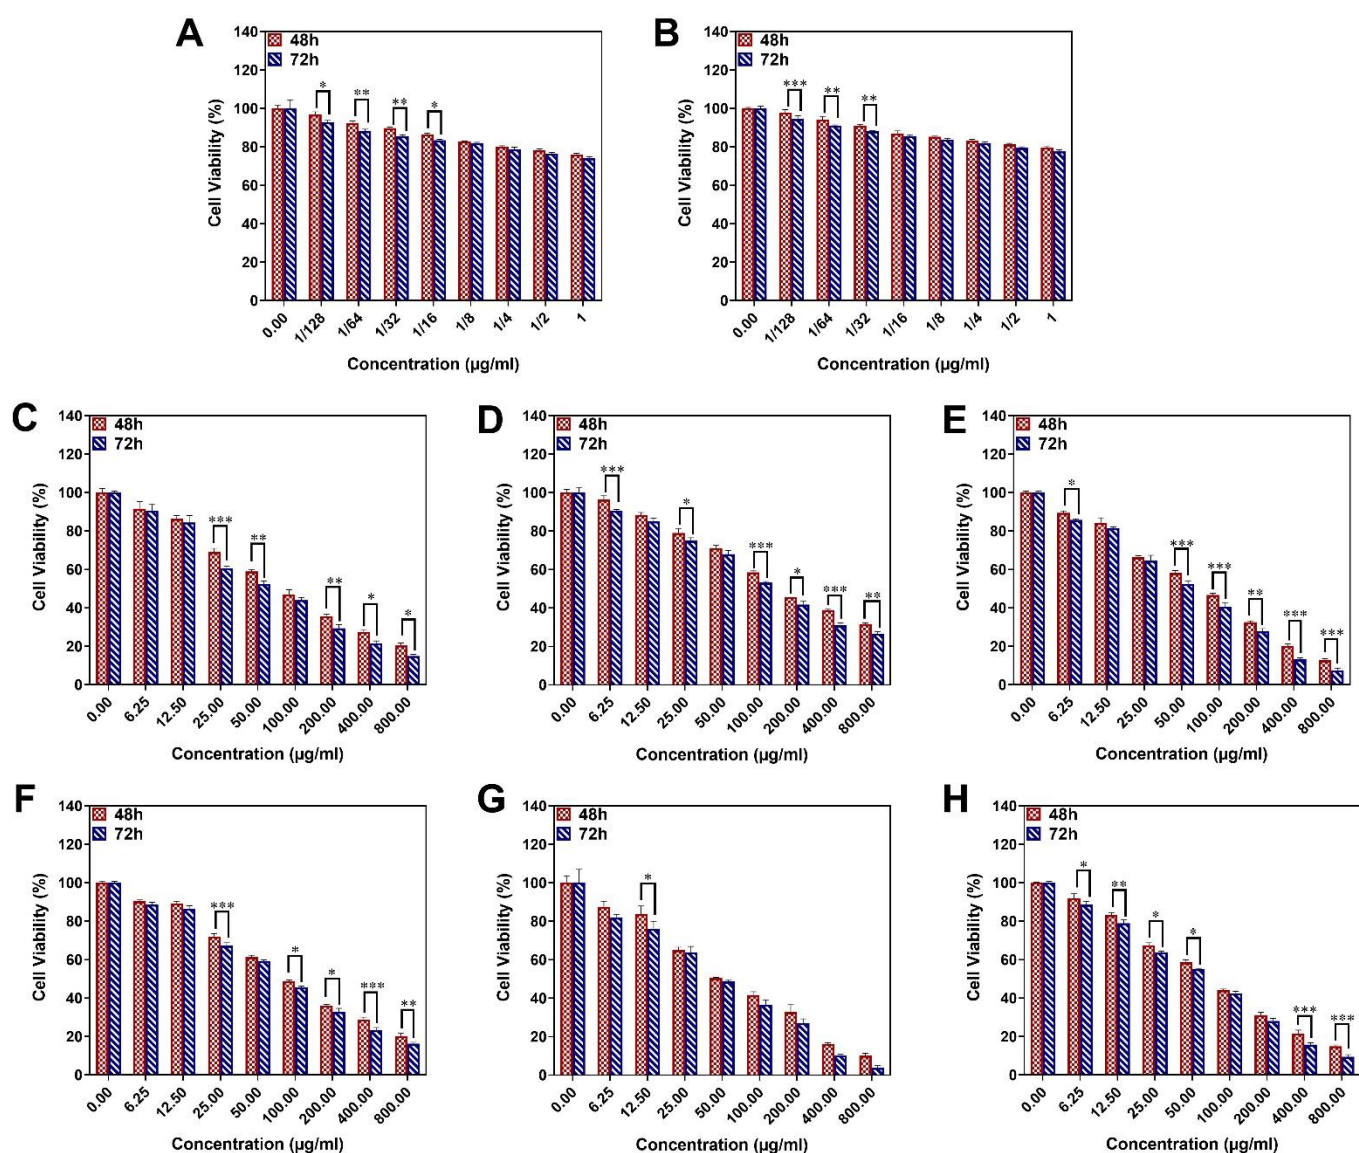

**Figure S5.** Cytotoxicity effect analysis of MCF7 (A: vehicle (Nio), C: Cur, E: Nio-Cur, and G: and PEG-FA@Nio-Cur) and 4T1 (B: vehicle (Nio), D: Cur, F: Nio-Cur, and H: and PEG-FA@Nio-Cur) cell lines against different fabricated niosomal and non-niosomal formulation treatment in 48hr 72hr (B and E) by various concentration.



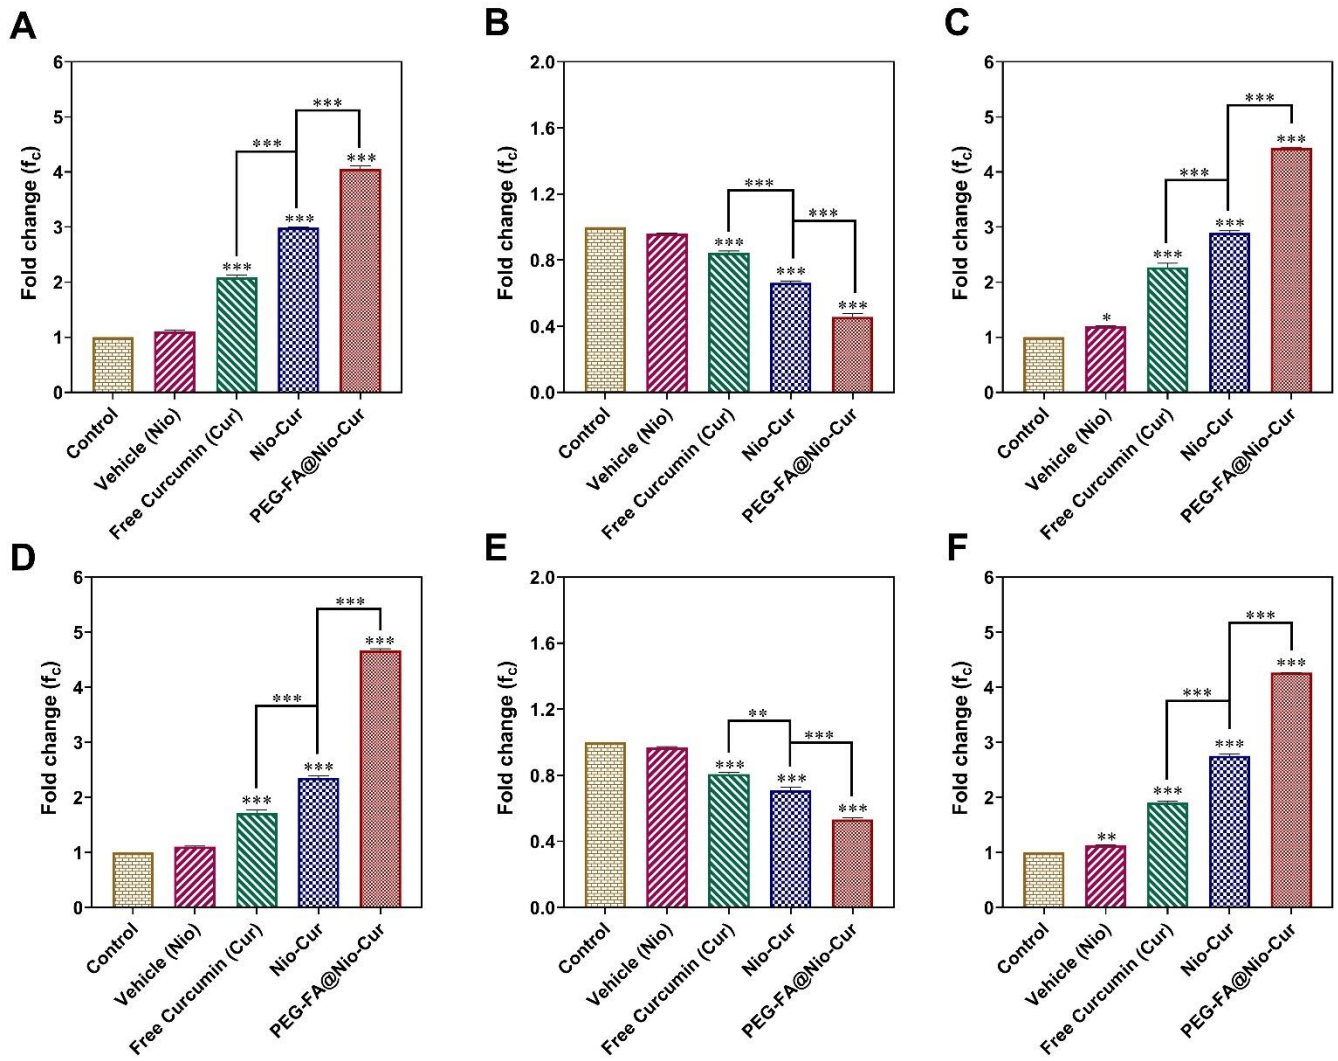

**Figure S6.** A. Expression levels of Bax, B. Bcl2, and C. p53 genes in MCF7 cells and D. Ex-pression levels of Bax, E. Bcl2, and F. p53 genes in 4T1 cells after those breast cancer cells were exposed to Vehicle (Nio), Free Curcumin, Nio-Cur, and PEG-FA@Nio-Cur (PBGD as housekeeping gene). Data represent means  $\pm$  standard deviations (n=3). For all charts, \*\*\*:  $p < 0.001$ ; \*\*:  $p < 0.01$ ; \*:  $p < 0.05$ .
